# Supplementary material for: Physical Activity and Life Expectancy With and Without Diabetes
Source: Oxford University Press journal article supplement (doi:10.2337/diacare.29.01.06.dc05-0985), 2006-01-01
Supplement: nusselderpg38appendixtable_1.pdf [file nusselderpg38appendixtable_1.pdf]

## Appendix Table 1

Transition rates by transition, level of physical activity and sex

|                                |          | Men                 | Women               |
|--------------------------------|----------|---------------------|---------------------|
| Incident diabetes              | Low      | 0.007 (0.004-0.006) | 0.005 (0.004-0.006) |
|                                | Moderate | 0.004 (0.002-0.004) | 0.003 (0.002-0.004) |
|                                | High     | 0.004 (0.002-0.004) | 0.003 (0.002-0.004) |
| No diagnosed diabetes to death | Low      | 0.033 (0.030-0.038) | 0.022 (0.019-0.024) |
|                                | Moderate | 0.024 (0.021-0.027) | 0.013 (0.012-0.150) |
|                                | High     | 0.019 (0.017-0.021) | 0.011 (0.010-0.013) |
| Diagnosed diabetes to death    | Low      | 0.093 (0.074-0.117) | 0.074 (0.058-0.093) |
|                                | Moderate | 0.061 (0.045-0.081) | 0.046 (0.034-0.062) |
|                                | High     | 0.045 (0.033-0.060) | 0.033 (0.022-0.050) |
